# Supplementary material for: US Power Production at Risk from Water Stress in a Changing Climate
Source: PubMed Central journal article supplement (PMC5607259; doi:10.1038/s41598-017-12133-9), 2017-09-20
Supplement: 41598_2017_12133_MOESM1_ESM.pdf [file 41598_2017_12133_MOESM1_ESM.pdf]

## **Supplementary Materials for**

### **US Power Production at Risk from Water Stress in a Changing Climate**

Poulomi Ganguli, Devashish Kumar, and Auroop R. Ganguly\*

Sustainability and Data Sciences Laboratory (SDS Lab),  
Department of Civil and Environmental Engineering,  
Northeastern University, Boston, MA-02115, USA  
Email: [a.ganguly@neu.edu](mailto:a.ganguly@neu.edu)  
Phone: 617-373-6005

**Table S1.** List of CMIP5 climate models along with their horizontal resolutions (Longitude x Latitude) and the number of initial condition runs used for historical and RCPs experiments

**Table S2.** List of CMIP5 models for which downscaled surface air temperature is available along with the number of initial conditions for historical and future experiments

**Table S3.** Regional thermoelectric power production capacity

**Table S4.** Regional annual power production capacity (Quad) under various water stress levels (WSL)

**Fig S1. Current surface runoff. a,b,** Spatial patterns of current (1991-2005) **(a)** low (10<sup>th</sup> percentile of all climate simulations) and **(b)** median (50<sup>th</sup> percentile) surface runoff. Figures are generated using MATLAB 2015a (Version 8.5, URL: <http://www.mathworks.com>).

**Fig S2. Current stream temperature. a,b,** Spatial patterns of current (1991-2005) **(a)** high (10<sup>th</sup> percentile of all climate simulations) and **(b)** median (50<sup>th</sup> percentile high stream temperature). Figures are generated using MATLAB 2015a (Version 8.5, URL: <http://www.mathworks.com>).

**Fig S3. U.S. climate regions.** Nine climatically homogeneous regions within the contiguous United States used in this study (see ref. 41 for details). ENC: East North Central, NE: Northeast, NW: Northwest, SE: Southeast, SW: Southwest, WNC: West North Central. Figure is generated using MATLAB 2015a (Version 8.5, URL: <http://www.mathworks.com>).

**Fig S4. Current surface air temperature. a,b,** Spatial patterns of current (1991-2005) **(a)** high (10<sup>th</sup> percentile of all climate simulations) and **(b)** median (50<sup>th</sup> percentile) surface air temperature. Figures are generated using MATLAB 2015a (Version 8.5, URL: <http://www.mathworks.com>).

**Fig S5. Evaluation of performance of SVR models.** Performance of SVR in predicting stream temperature at training phase (1991 – 2005) in few selected stream gauges over the nine climatologically homogeneous regions. Figures are generated using MATLAB 2015a (Version 8.5, URL: <http://www.mathworks.com>).

**Fig S6. Evaluation of performance of SVR models.** Performance of SVR in predicting stream temperature at validation phase (2006 - 2013) in few selected stream gauges over the nine climatologically homogeneous regions. Figures are generated using MATLAB 2015a (Version 8.5, URL: <http://www.mathworks.com>).

**Table S1.** List of CMIP5 climate models along with their horizontal resolutions (Longitude x Latitude) and the number of initial condition runs used for historical and RCPs experiments

| No | Model Name     | Resolution (lon x lat) | Historical | RCP2.6    | RCP4.5     | RCP6      | RCP8.5    |
|----|----------------|------------------------|------------|-----------|------------|-----------|-----------|
| 1  | ACCESS1-0      | 192 x 145              | 2          | -         | 1          | -         | 1         |
| 2  | ACCESS1-3      | 192 x 145              | 3          | -         | 1          | -         | 1         |
| 3  | BCC-CSM1.1     | 128 x 64               | 3          | 1         | 1          | 1         | 1         |
| 4  | BCC-CSM1.1(m)  | 320 x 160              | -          | 1         | 1          | 1         | 1         |
| 5  | BNU-ESM        | 128 x 64               | 1          | 1         | 1          | -         | 1         |
| 6  | CanESM2        | 128 x 64               | 5          | 5         | 5          | -         | 5         |
| 7  | CCSM4          | 128 x 64               | 8          | 5         | 6          | 6         | 5         |
| 8  | CESM1-BGC      | 288 x 192              | 1          | -         | 1          | -         | 1         |
| 9  | CESM1-CAM5     | 288 x 192              | 3          | 3         | 3          | 3         | 3         |
| 10 | CESM1-FASTCHEM | 288 x 192              | 3          | -         | -          | -         | -         |
| 11 | CESM1-WACCM    | 144 x 96               | 7          | 3         | 3          | -         | -         |
| 12 | CMCC-CESM      | 96 x 48                | 1          | -         | -          | -         | 1         |
| 13 | CMCC-CM        | 480 x 240              | -          | -         | 1          | -         | 1         |
| 14 | CNRM-CM5-2     | 256 x 128              | 1          | -         | -          | -         | -         |
| 15 | CNRM-CM5       | 256 x 128              | 1          | 3         | 1          | -         | 5         |
| 16 | CSIRO-MK3-6-0  | 192 x 96               | 10         | 10        | 10         | 10        | 10        |
| 17 | CSIRO-MK3L-1-2 | 64 x 56                | 3          | -         | -          | -         | -         |
| 18 | EC-EARTH       | 320 x 160              | 1          | -         | 2          | -         | 2         |
| 19 | FIO-ESM        | 128 x 64               | -          | 3         | 3          | 3         | 2         |
| 20 | FGOALS-g2      | 128 x 60               | 5          | 1         | -          | -         | 1         |
| 21 | GFDL-CM2p1     | 144 x 90               | 2          | -         | 10         | -         | -         |
| 22 | GFDL-CM3       | 144 x 90               | 5          | -         | -          | 1         | 1         |
| 23 | GFDL-ESM2G     | 144 x 90               | 1          | -         | 1          | 1         | 1         |
| 24 | GISS-E2-H-CC   | 144 x 90               | 1          | -         | 1          | -         | 1         |
| 25 | GISS-E2-R-CC   | 144 x 90               | 1          | -         | 1          | -         | 1         |
| 26 | GISS-E2-H      | 144 x 90               | 10         | 3         | 15         | 3         | 2         |
| 27 | GISS-E2-R      | 144 x 90               | 22         | 3         | 13         | 3         | 5         |
| 28 | HadCM3         | 96 x 73                | 10         | -         | 10         | -         | -         |
| 29 | HadGEM2-CC     | 192 x 145              | 8          | -         | 1          | -         | 3         |
| 30 | HadGEM2-ES     | 192 x 145              | -          | 4         | 4          | 4         | 4         |
| 31 | INM-CM4        | 180 x 120              | 1          | -         | 1          | -         | 1         |
| 32 | IPSL-CM5A-LR   | 96 x 96                | 6          | 4         | 4          | 1         | 4         |
| 33 | IPSL-CM5A-MR   | 144 x 143              | 3          | 3         | 1          | 1         | 1         |
| 34 | IPSL-CM5B-LR   | 96 x 96                | 1          | -         | 1          | -         | 1         |
| 35 | MIROC4h        | 640 x 320              | 3          | -         | 3          | -         | -         |
| 36 | MIROC5         | 256 x 128              | 5          | 5         | 5          | 5         | 5         |
| 37 | MIROC-ESM      | 128 x 64               | 3          | 1         | 1          | 1         | 1         |
| 38 | MIROC-ESM-CHEM | 128 x 64               | 1          | 1         | 2          | 1         | 1         |
| 39 | MPI-ESM-LR     | 192 x 96               | 3          | 2         | 3          | -         | 3         |
| 40 | MPI-ESM-MR     | 192 x 96               | 3          | 1         | 3          | -         | 1         |
| 41 | MPI-ESM-P      | 192 x 96               | 2          | -         | -          | -         | -         |
| 42 | MRI-CGCM3      | 320 x 160              | 5          | 1         | 1          | 1         | 1         |
| 43 | MRI-ESM1       | 320 x 160              | 1          | -         | -          | -         | -         |
| 44 | NorESM1-ME     | 144 x 96               | 1          | 1         | 1          | 1         | -         |
| 45 | NorESM1-M      | 144 x 96               | 3          | 1         | 1          | 1         | 1         |
|    | <b>Total</b>   |                        | <b>159</b> | <b>66</b> | <b>123</b> | <b>48</b> | <b>79</b> |

\* The short hyphen ('-') indicates particular climate realization is not available for download.

**Table S2.** List of CMIP5 models for which downscaled surface air temperature is available along with the number of initial conditions for historical and future experiments

| No. | Model Name     | Historical | RCP2.6    | RCP4.5    | RCP6      | RCP8.5    |
|-----|----------------|------------|-----------|-----------|-----------|-----------|
| 1   | ACCESS1-0      | 1          | -         | 1         | -         | 1         |
| 2   | ACCESS1-3      | 1          | -         | 1         | -         | 1         |
| 3   | BCC-CSM1.1     | 1          | 1         | 1         | 1         | 1         |
| 4   | BCC-CSM1.1(m)  | 1          | -         | 1         | -         | 1         |
| 5   | CanESM2        | 5          | 5         | 5         | -         | 5         |
| 6   | CCSM4          | 5          | 5         | 4         | 4         | 5         |
| 7   | CESM1-BGC      | 1          | -         | 1         | -         | 1         |
| 8   | CESM1-CAM5     | 3          | 3         | 3         | 2         | 3         |
| 9   | CMCC-CM        | 1          | -         | 1         | -         | 1         |
| 10  | CNRM-CM5       | 5          | -         | 1         | 5         | -         |
| 11  | CSIRO-MK3-6-0  | 10         | 10        | 10        | 10        | 10        |
| 12  | EC-EARTH       | 4          | 2         | 3         | -         | 3         |
| 13  | FGOALS-g2      | 3          | 1         | 2         | -         | 3         |
| 14  | FIO-ESM        | 3          | 3         | 3         | 3         | 3         |
| 15  | GFDL-CM3       | 1          | 1         | 1         | 1         | 1         |
| 16  | GFDL-ESM2G     | 1          | 1         | 1         | 1         | 1         |
| 17  | GFDL-ESM2M     | 1          | 1         | 1         | 1         | 1         |
| 18  | GISS-E2-H-CC   | 1          | -         | 1         | -         | -         |
| 19  | GISS-E2-R-CC   | 1          | -         | 1         | -         | -         |
| 20  | GISS-E2-R      | 5          | 1         | 1         | 1         | 1         |
| 21  | HadCM3         | 4          | -         | 4         | -         | -         |
| 22  | HadGEM2-AO     | 1          | 1         | 1         | 1         | 1         |
| 23  | HadGEM2-CC     | 1          | -         | 1         | -         | 1         |
| 24  | HadGEM2-ES     | 4          | 4         | 4         | 4         | 4         |
| 25  | INM-CM4        | 1          | -         | 1         | -         | 1         |
| 26  | IPSL-CM5A-LR   | 4          | 3         | 4         | 1         | 4         |
| 27  | IPSL-CM5A-MR   | 1          | 1         | 1         | 1         | 1         |
| 28  | IPSL-CM5B-LR   | 1          | -         | 1         | -         | 1         |
| 29  | MIROC4h        | 3          | -         | 3         | -         | -         |
| 30  | MIROC5         | 1          | 1         | 1         | 1         | 1         |
| 31  | MIROC-ESM      | 1          | 1         | 1         | 1         | 1         |
| 32  | MIROC-ESM-CHEM | 1          | 1         | 1         | 1         | 1         |
| 33  | MPI-ESM-LR     | 3          | 3         | 3         | -         | 3         |
| 34  | MPI-ESM-MR     | 1          | 1         | 1         | -         | 1         |
| 35  | MRI-CGCM3      | 1          | 1         | 1         | -         | 1         |
| 36  | NorESM1-ME     | 1          | 1         | 1         | 1         | 1         |
| 37  | NorESM1-M      | 1          | 1         | 1         | 1         | 1         |
|     | <b>Total</b>   | <b>84</b>  | <b>53</b> | <b>73</b> | <b>41</b> | <b>65</b> |

**Table S3.** Regional thermoelectric power production capacity

| <b>Regions</b>           | <b>Number of Power Plants</b> | <b>Annual Production Capacity (Quad)</b> |
|--------------------------|-------------------------------|------------------------------------------|
| Central                  | 140                           | 2.487                                    |
| East North Central (ENC) | 78                            | 0.802                                    |
| Northeast (NE)           | 128                           | 1.594                                    |
| Northwest (NW)           | 16                            | 0.138                                    |
| Southeast (SE)           | 140                           | 2.416                                    |
| South                    | 193                           | 2.138                                    |
| Southwest (SW)           | 51                            | 0.728                                    |
| West                     | 44                            | 0.397                                    |
| West North Central (WNC) | 25                            | 0.373                                    |
| <b>Total</b>             | <b>815</b>                    | <b>11.073</b>                            |

**Table S4.** Regional annual power production capacity (Quad) under various water stress levels (WSL)

WSL1:  $-0.50 \leq WSI \leq 0$

WSL2:  $-0.75 \leq WSI \leq -0.50$

WSL3:  $-1.0 \leq WSI \leq -0.75$

WSL4:  $-1.5 \leq WSI \leq -1.0$

WSL5:  $WSI \leq -1.5$

| Year    | 1996-2005 |        |        |       |       |
|---------|-----------|--------|--------|-------|-------|
| Regions | WSL1      | WSL2   | WSL3   | WSL4  | WSL5  |
| Central | 0         | 2.444  | 0.043  | 0     | 0     |
| ENC     | 0         | 0.492  | 0.244  | 0.065 | 0     |
| NE      | 0         | 0.662  | 0.932  | 0     | 0     |
| NW      | 0         | 0.138  | 0      | 0     | 0     |
| SE      | 0.401     | 1.719  | 0.297  | 0     | 0     |
| South   | 0         | 2.053  | 0.085  | 0     | 0     |
| SW      | 0.074     | 0.653  | 0.000  | 0     | 0     |
| West    | 0.011     | 0.194  | 0      | 0.146 | 0.043 |
| WNC     | 0         | 0.355  | 0.002  | 0     | 0     |
| Total   | 0.486     | 8.710  | 1.603  | 0.211 | 0.043 |
| % Total | 4.39%     | 78.80% | 14.51% | 1.91% | 0.39% |

| 2006-2015 |        |        |       |       |         |
|-----------|--------|--------|-------|-------|---------|
| WSL1      | WSL2   | WSL3   | WSL4  | WSL5  | Total   |
| 0         | 2.330  | 0.157  | 0     | 0     | 2.487   |
| 0.136     | 0.504  | 0.162  | 0     | 0     | 0.802   |
| 0.002     | 1.296  | 0.295  | 0     | 0     | 1.594   |
| 0         | 0.122  | 0.016  | 0     | 0     | 0.138   |
| 0.106     | 1.900  | 0.410  | 0     | 0     | 2.416   |
| 0.337     | 1.696  | 0.105  | 0     | 0     | 2.138   |
| 0         | 0.728  | 0      | 0     | 0     | 0.728   |
| 0.004     | 0.350  | 0.038  | 0.005 | 0     | 0.397   |
| 0         | 0.373  | 0      | 0     | 0     | 0.373   |
| 0.584     | 9.299  | 1.184  | 0.005 | 0.000 | 11.073  |
| 5.28%     | 83.98% | 10.70% | 0.05% | 0.00% | 100.00% |

| Year    | 2016-2025 |       |        |       |       |
|---------|-----------|-------|--------|-------|-------|
| Regions | WSL1      | WSL2  | WSL3   | WSL4  | WSL5  |
| Central | 0.122     | 0.067 | 2.298  | 0     | 0     |
| ENC     | 0         | 0.091 | 0.711  | 0     | 0     |
| NE      | 0.040     | 0.238 | 1.317  | 0     | 0     |
| NW      | 0         | 0     | 0.138  | 0     | 0     |
| SE      | 0         | 0.266 | 1.613  | 0.537 | 0     |
| South   | 0         | 0.056 | 2.045  | 0.037 | 0     |
| SW      | 0         | 0.039 | 0.689  | 0     | 0     |
| West    | 0         | 0     | 0.397  | 0     | 0     |
| WNC     | 0         | 0     | 0.373  | 0     | 0     |
| Total   | 0.161     | 0.758 | 9.580  | 0.574 | 0.000 |
| % Total | 1.46%     | 6.84% | 86.52% | 5.18% | 0.00% |

| 2026-2035 |       |        |        |       |         |
|-----------|-------|--------|--------|-------|---------|
| WSL1      | WSL2  | WSL3   | WSL4   | WSL5  | Total   |
| 0         | 0     | 2.357  | 0.130  | 0     | 2.487   |
| 0         | 0     | 0.727  | 0.075  | 0     | 0.802   |
| 0         | 0     | 1.272  | 0.322  | 0     | 1.594   |
| 0.043     | 0.010 | 0.068  | 0.016  | 0     | 0.138   |
| 0         | 0     | 2.162  | 0.255  | 0     | 2.416   |
| 0.006     | 0.014 | 0.694  | 1.424  | 0     | 2.138   |
| 0.002     | 0.098 | 0.298  | 0.285  | 0.045 | 0.728   |
| 0         | 0.091 | 0.118  | 0.188  | 0     | 0.397   |
| 0         | 0     | 0.011  | 0.332  | 0.030 | 0.373   |
| 0.051     | 0.214 | 7.706  | 3.026  | 0.075 | 11.073  |
| 0.46%     | 1.93% | 69.59% | 27.33% | 0.68% | 100.00% |

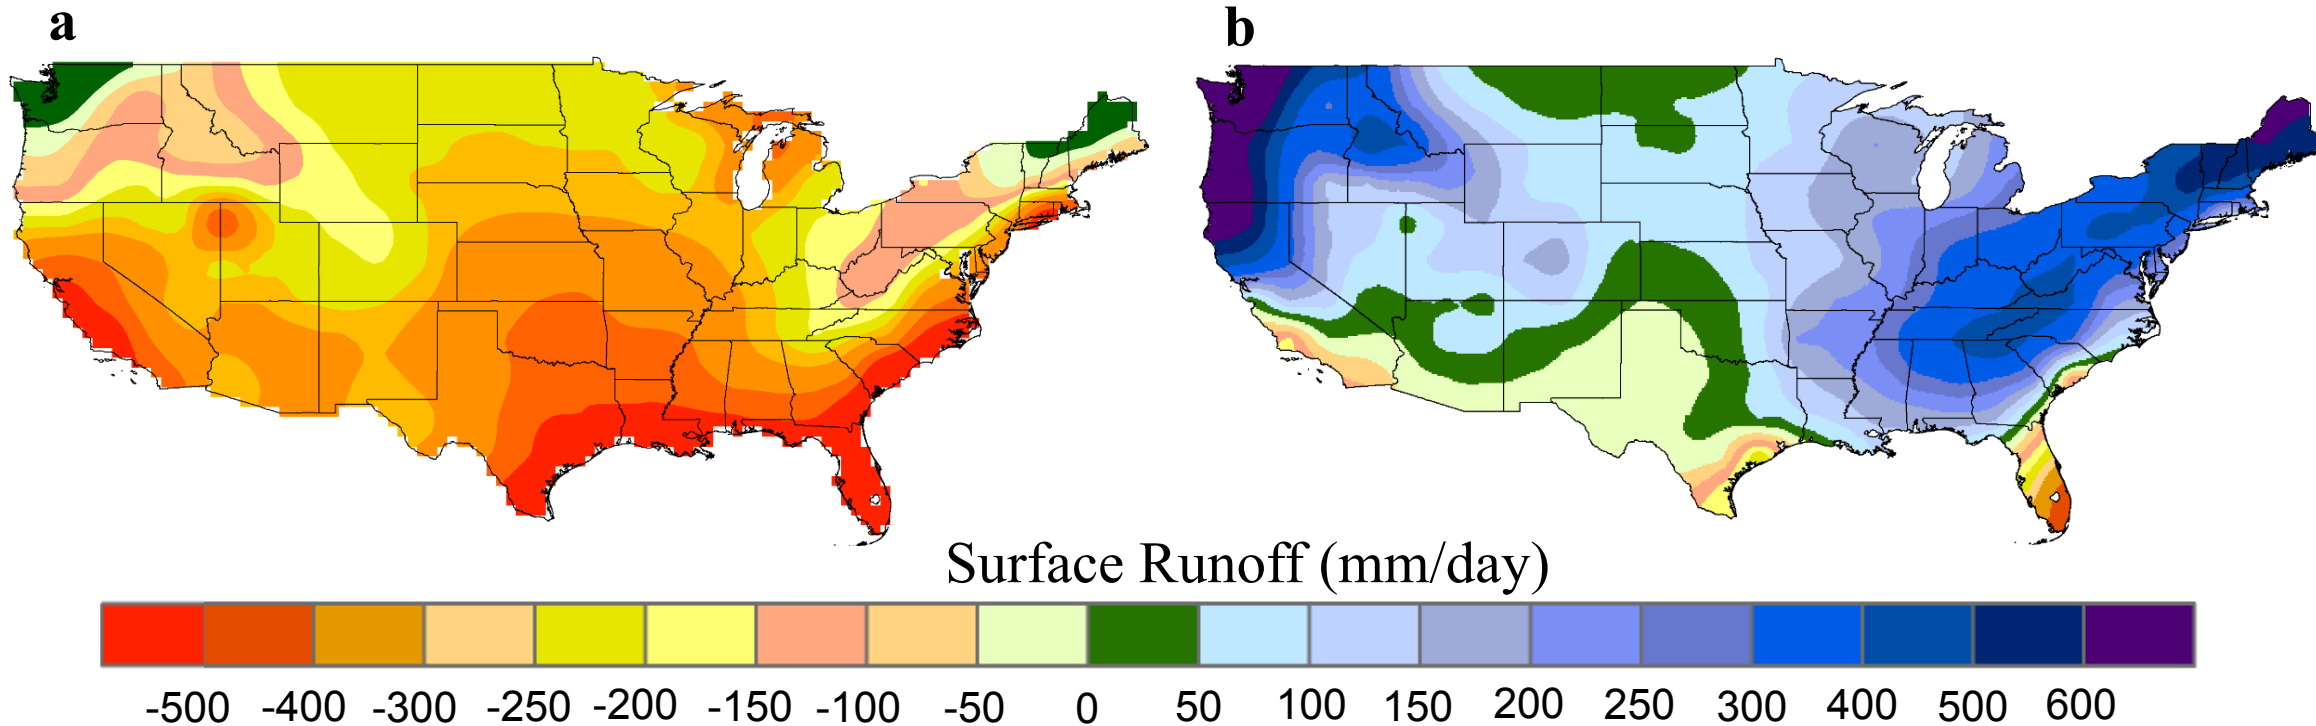

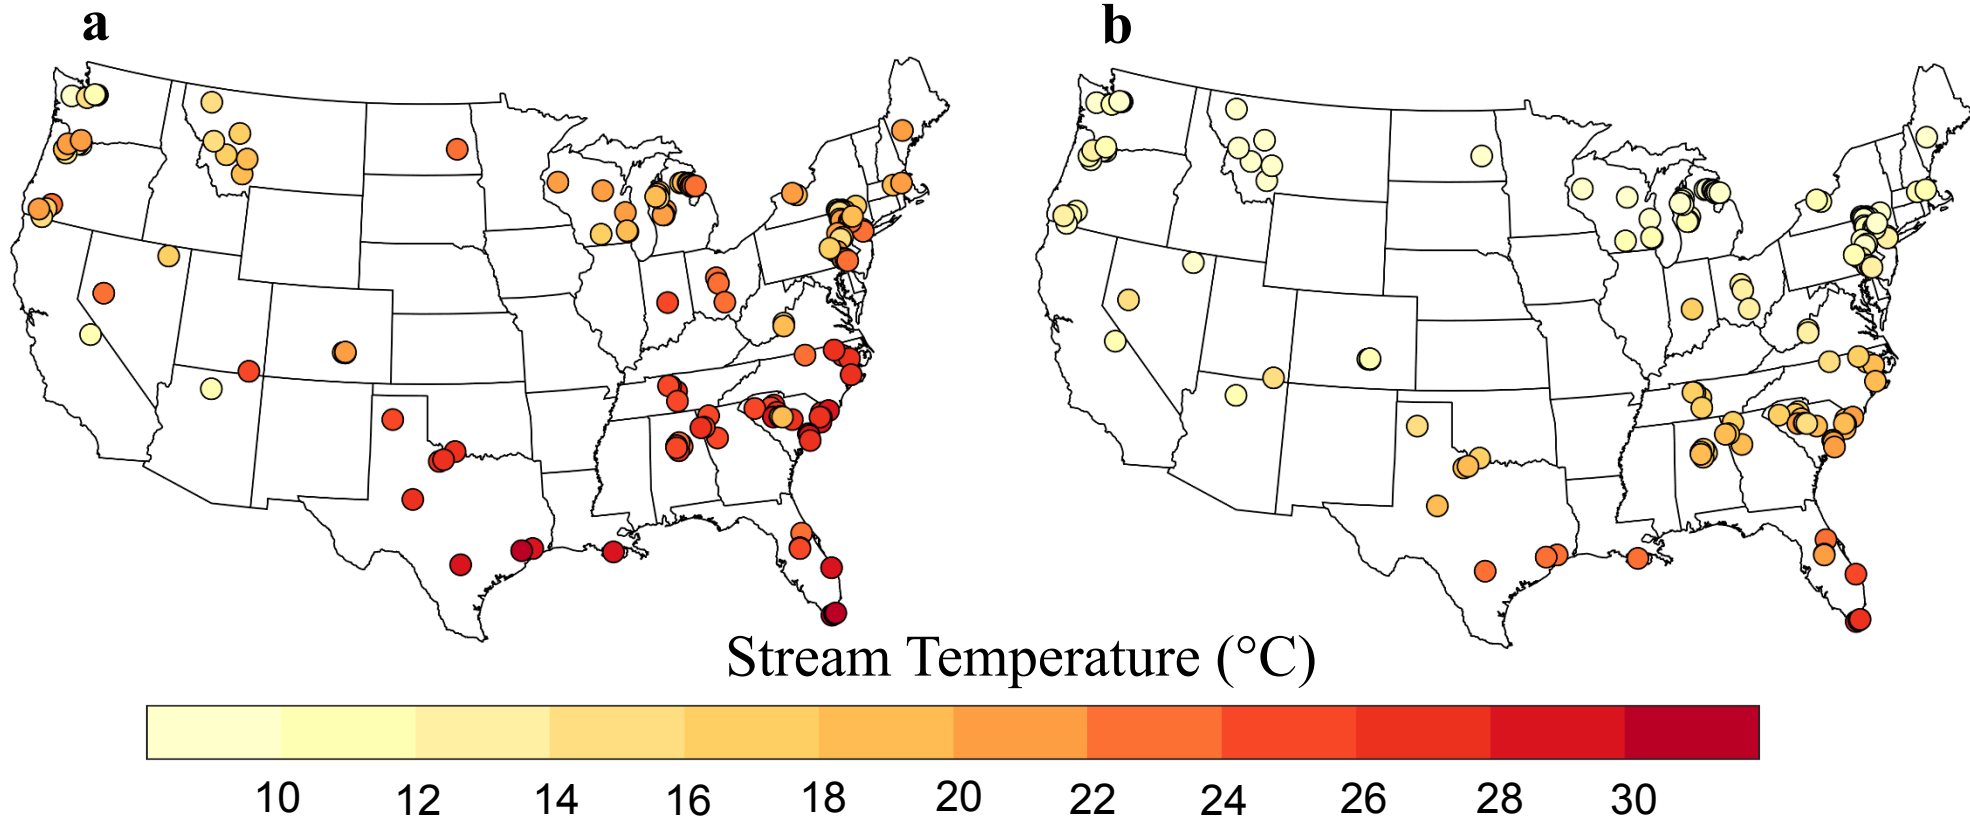



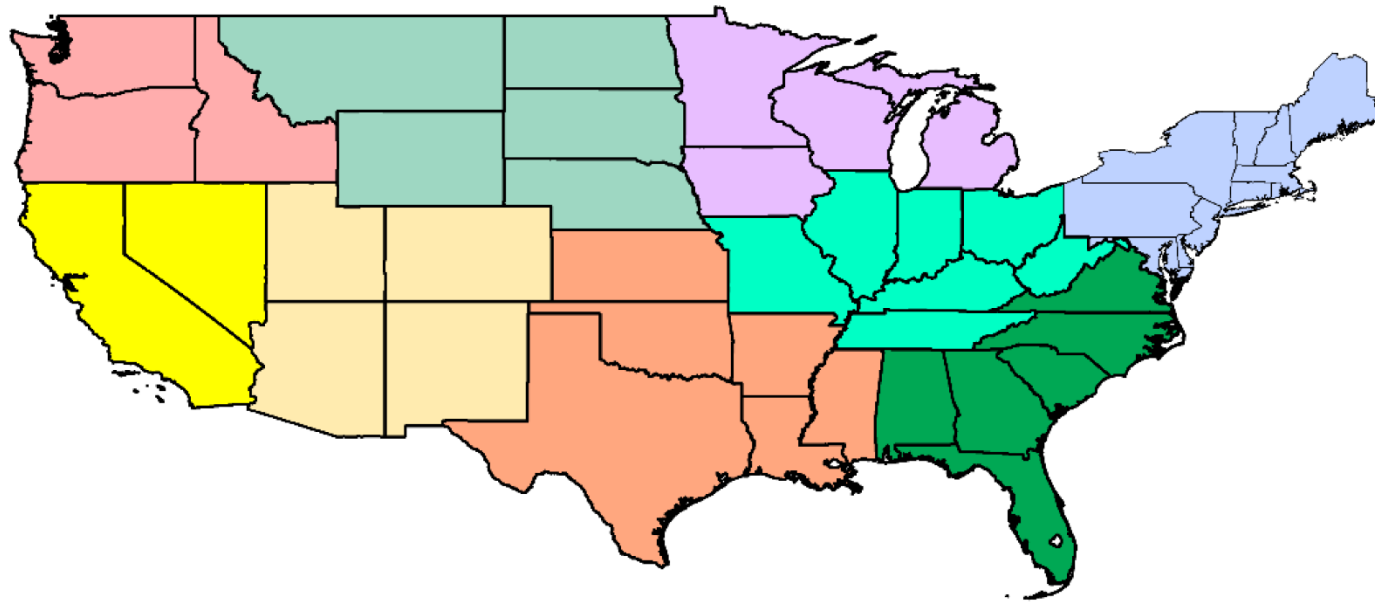

## Regions

-  CENTRAL
-  ENC
-  NE
-  NW
-  SE
-  SOUTH
-  SW
-  WEST
-  WNC

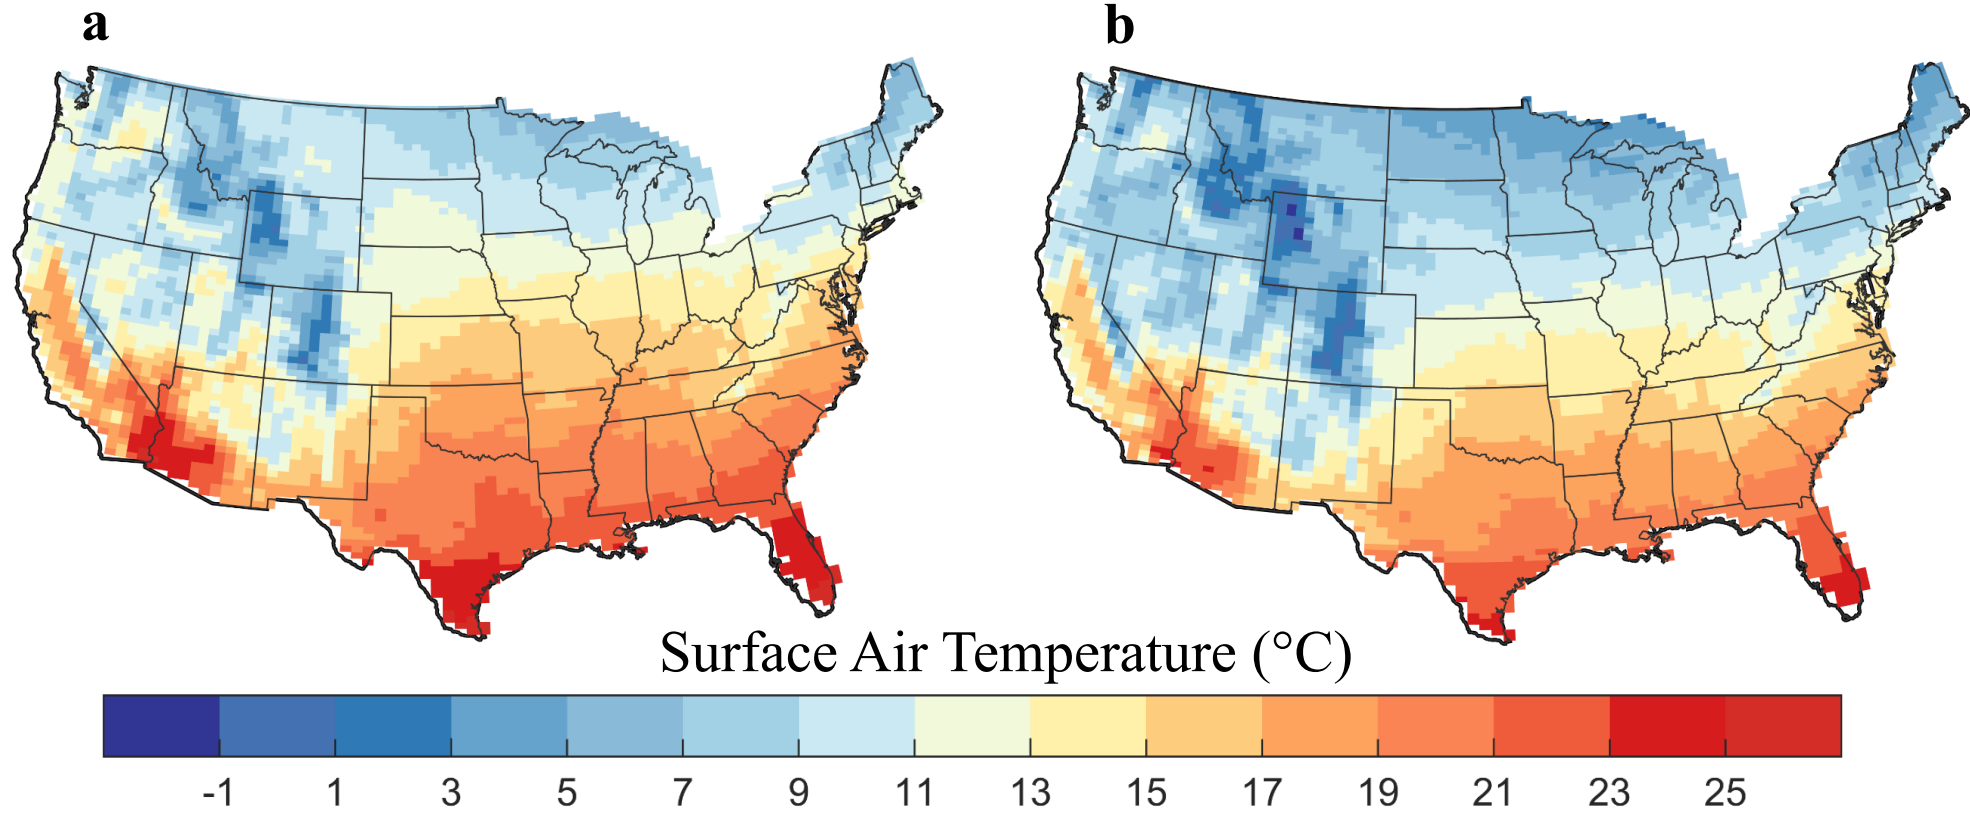

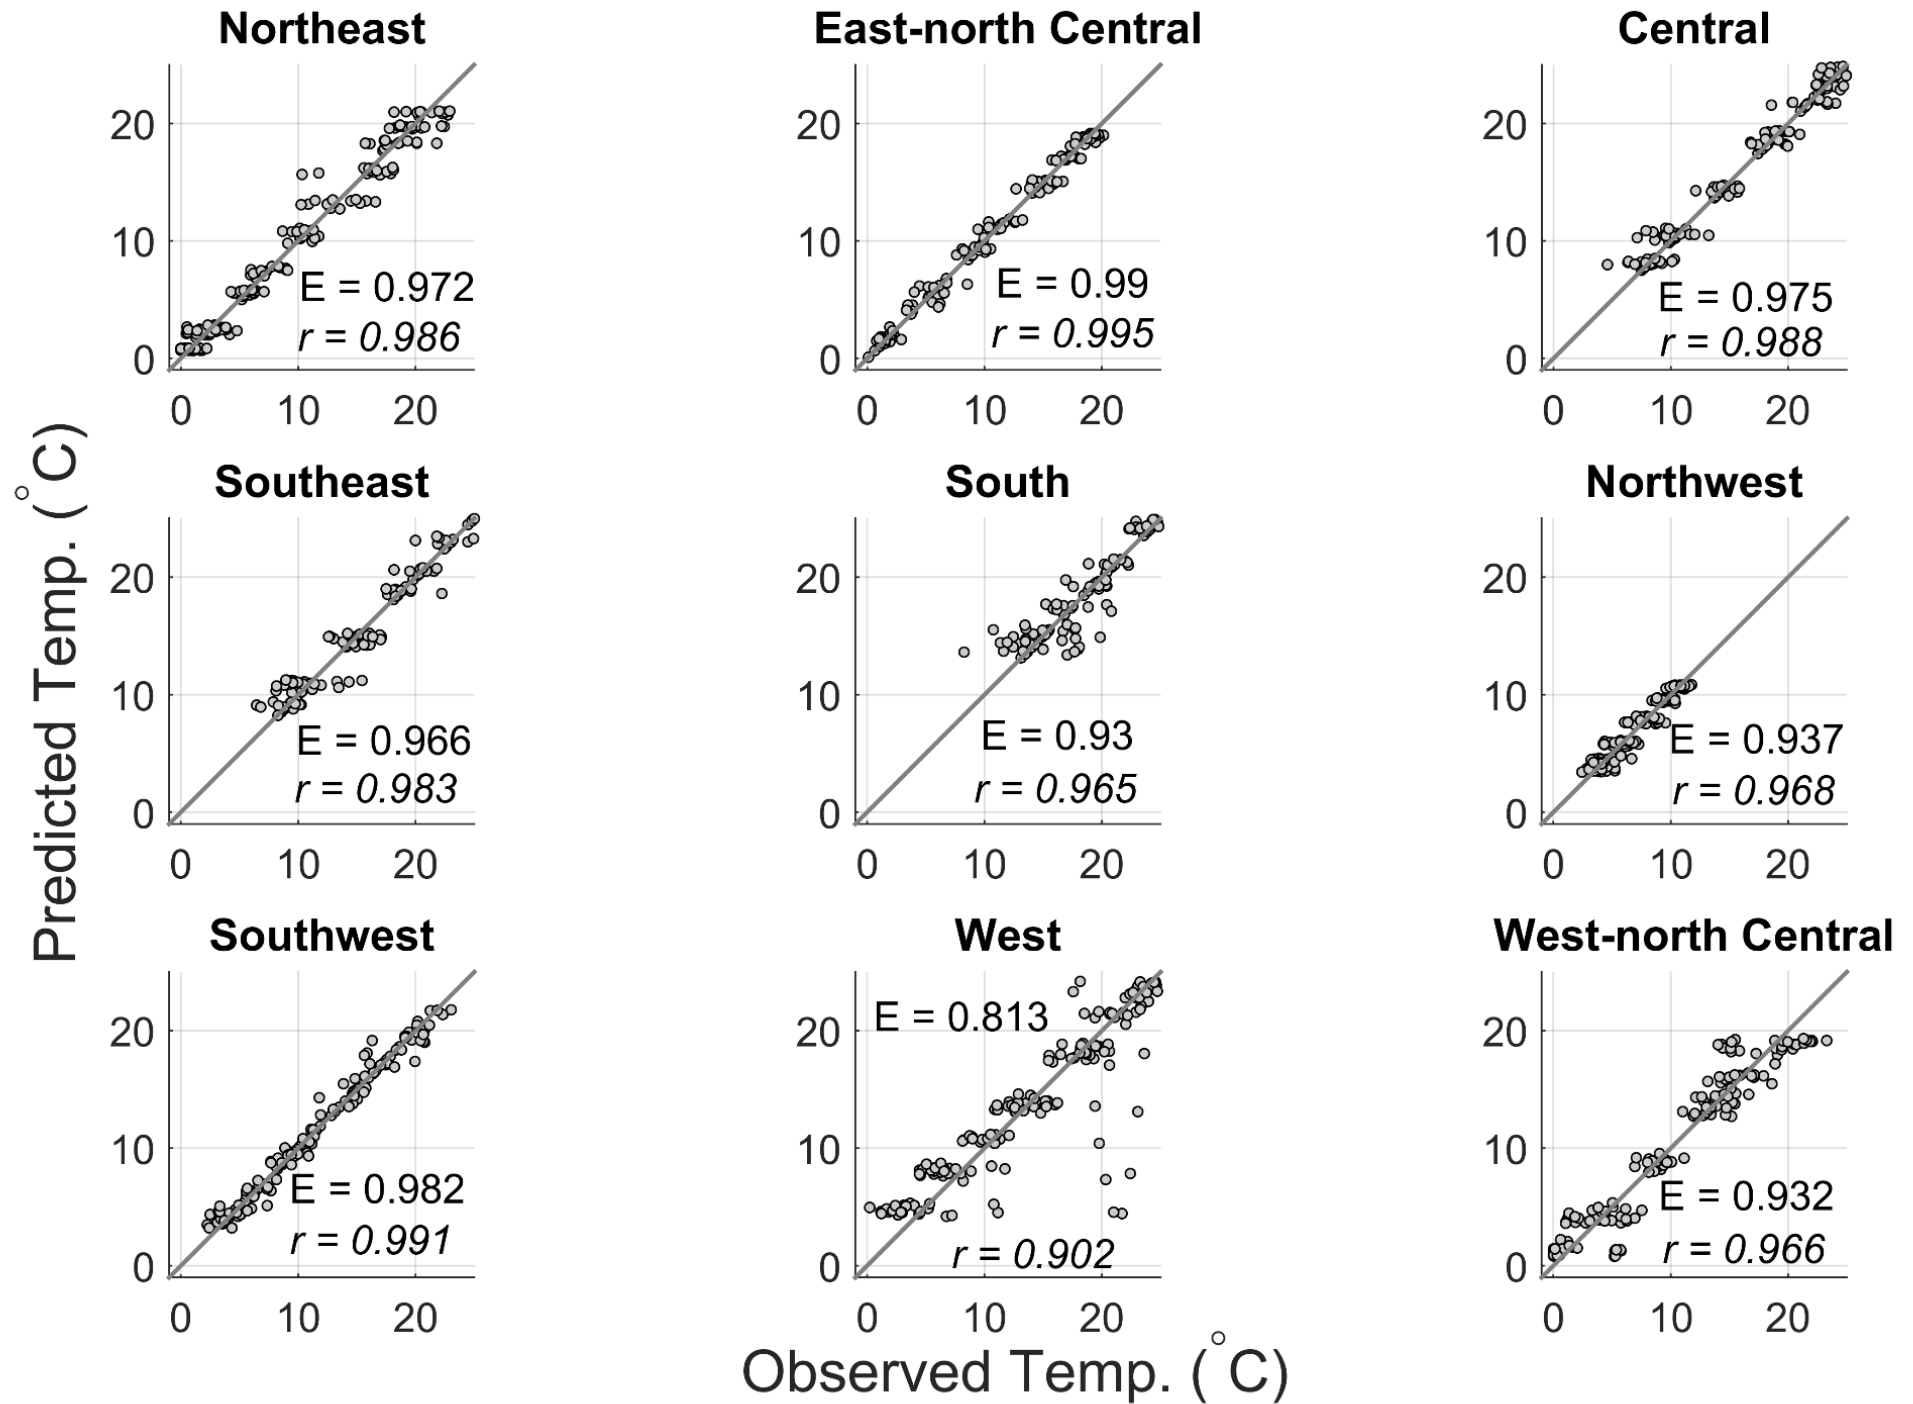

Predicted Temp. (°C)

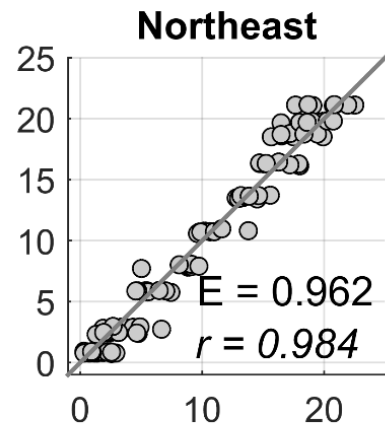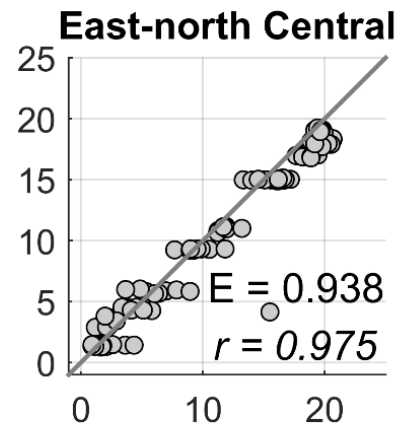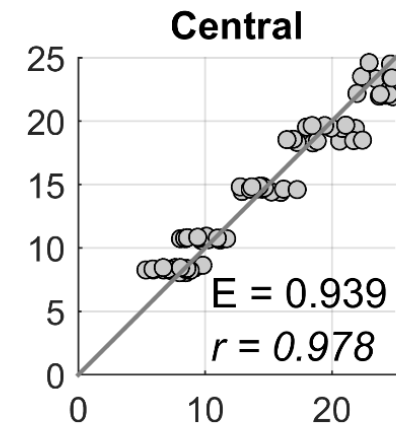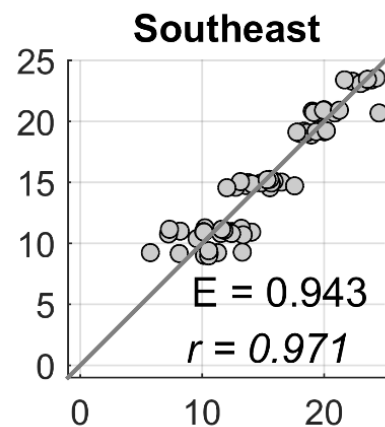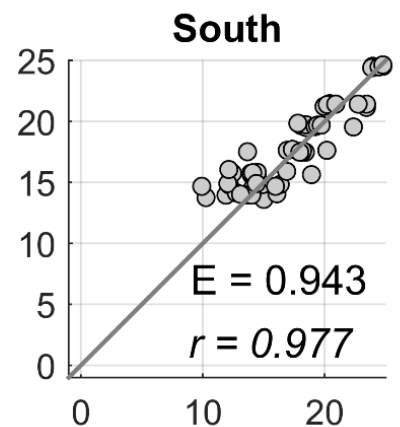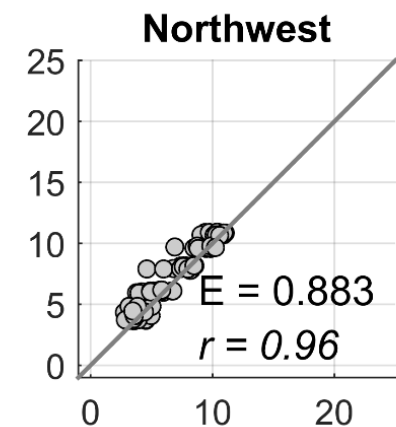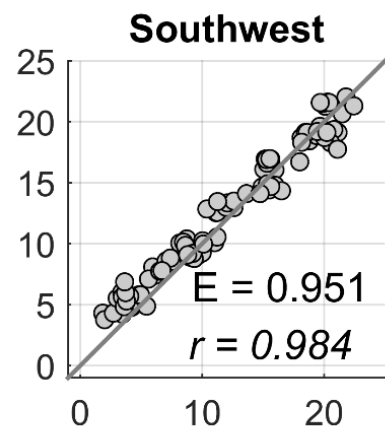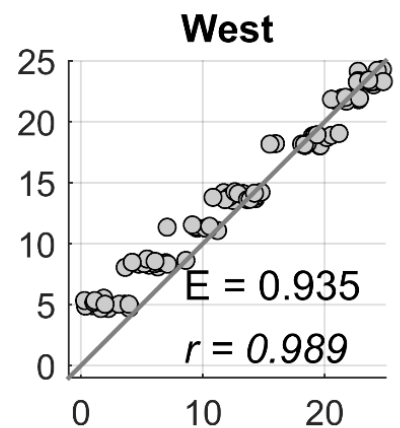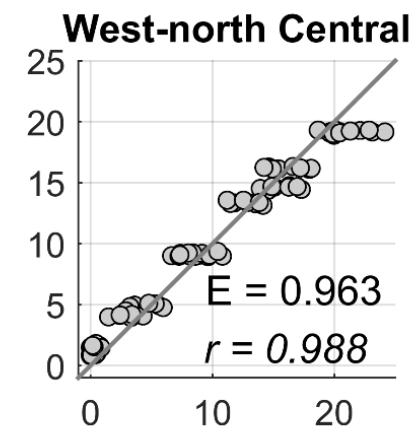

Observed Temp. (°C)
